# Supplementary material for: Nursing students satisfaction level Regarding Clinical learning environment in Peshawar
Source: bioRxiv or medRxiv preprint supplement (doi:10.1101/2023.01.08.23284312), 2023-01-11
Supplement: Supplementary file [file media-1.pdf]

No. KMU/IPHSS/Ethics/2022/AB/073

Dated: 24-10-2022

## **TO WHOM IT MAY CONCERN**

Certified that Ethical Approval has been granted to the project title

### **Nursing student's satisfaction level regarding clinical environment in Peshawar**

submitted by Ihsanur Rehman, Scholar of Master in Public Health (MPH), under the supervision of Dr. Naveed Sadiq, Assistant Professor, IPH&SS, Khyber Medical University, Peshawar.

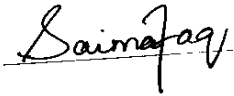

**Director (IPH&SS)**  
IPH&SS-Ethics Board
